# Supplementary material for: The Effect of Non-Pharmacological and Pharmacological Interventions on Measures Associated with Sarcopenia in End-Stage Kidney Disease: A Systematic Review and Meta-Analysis
Source: MDPI journal article supplement (doi:10.3390/nu14091817), 2022-04-27
Supplement: s1 [file s1]

Table S1: Full search strategy for the MEDLINE and CINAHL databases.  
Dual-energy x-ray absorptiometry (DEXA), end-stage kidney disease (ESKD), end-stage renal disease (ESRD), magnetic resonance imaging (MRI), MeSH terms (MH), short physical performance battery (SPPB).

|    | Search term                                                                                                                                                                               | Field        |
|----|-------------------------------------------------------------------------------------------------------------------------------------------------------------------------------------------|--------------|
| 1  | Renal insufficiency                                                                                                                                                                       | MH (explode) |
| 2  | Renal insufficiency                                                                                                                                                                       | TX           |
| 3  | Renal insufficiency, chronic                                                                                                                                                              | MH (explode) |
| 4  | Renal insufficiency, chronic                                                                                                                                                              | TX           |
| 5  | Renal Dialysis                                                                                                                                                                            | MH (explode) |
| 6  | Renal dialysis                                                                                                                                                                            | TX           |
| 7  | Kidney failure, chronic                                                                                                                                                                   | MH           |
| 8  | Kidney failure, chronic                                                                                                                                                                   | TX           |
| 9  | Renal Replacement therapy                                                                                                                                                                 | MH           |
| 10 | Renal Replacement therapy                                                                                                                                                                 | TX           |
| 11 | Haemodialysis                                                                                                                                                                             | TX           |
| 12 | Hemodialysis                                                                                                                                                                              | TX           |
| 13 | Dialysis                                                                                                                                                                                  | TX           |
| 14 | ESRD                                                                                                                                                                                      | TX           |
| 15 | ESKD                                                                                                                                                                                      | TX           |
| 16 | kidney disease adj2 (end-stage OR end stage OR chronic)                                                                                                                                   | TX           |
| 17 | renal disease adj2 (end-stage OR end stage OR chronic)                                                                                                                                    | TX           |
| 18 | kidney failure adj2 (end-stage OR end stage OR chronic)                                                                                                                                   | TX           |
| 19 | Renal replacement therapy                                                                                                                                                                 | TX           |
| 20 | renal failure adj2 (end-stage OR end stage OR chronic)                                                                                                                                    | TX           |
| 21 | Transplants                                                                                                                                                                               | MH (explode) |
| 22 | Transplants                                                                                                                                                                               | TX           |
| 23 | Kidney diseases                                                                                                                                                                           | MH (explode) |
| 24 | Kidney diseases                                                                                                                                                                           | TX           |
| 25 | Peritoneal dialysis                                                                                                                                                                       | MH (explode) |
| 26 | Peritoneal dialysis                                                                                                                                                                       | TX           |
| 27 | Peritoneal dialysis, continuous ambulatory                                                                                                                                                | MH (explode) |
| 28 | Peritoneal dialysis, continuous ambulatory                                                                                                                                                | TX           |
| 29 | Kidney transplantation                                                                                                                                                                    | MH (explode) |
| 30 | Kidney transplantation                                                                                                                                                                    | TX           |
| 31 | Conservative treatment                                                                                                                                                                    | MH (explode) |
| 32 | Conservative treatment                                                                                                                                                                    | TX           |
| 33 | 1 OR 2 OR 3 OR 4 OR 5 OR 6 OR 7 OR 8 OR 9 OR 10 OR 11 OR 12 OR 13 OR 14 OR 15 OR 16 OR 17 OR 18 OR 19 OR 20 OR 21 OR 22 OR 23 OR 24 OR 25 OR 26 OR 27 OR 28 OR 29 OR 30 OR 31 OR 32 OR 32 |              |
| 34 | Life Style                                                                                                                                                                                | MH (explode) |
| 35 | Life Style                                                                                                                                                                                | TX           |
| 36 | Lifestyle                                                                                                                                                                                 | TX           |
| 37 | Lifestyle intervention                                                                                                                                                                    | TX           |
| 38 | Exercise                                                                                                                                                                                  | MH (explode) |
| 39 | Exercise                                                                                                                                                                                  | TX           |
| 40 | Healthy lifestyle                                                                                                                                                                         | MH (explode) |
| 41 | Healthy lifestyle                                                                                                                                                                         | TX           |
| 42 | Exercise therapy                                                                                                                                                                          | MH (explode) |
| 43 | Exercise therapy                                                                                                                                                                          | TX           |
| 44 | Exercise training                                                                                                                                                                         | TX           |
| 45 | Exercise program*                                                                                                                                                                         | TX           |
| 46 | Aerobic exercise                                                                                                                                                                          | TX           |
| 47 | Aerobic training                                                                                                                                                                          | TX           |
| 48 | Resistance training                                                                                                                                                                       | MH (explode) |
| 49 | Resistance training                                                                                                                                                                       | TX           |
| 50 | Physical Activity                                                                                                                                                                         | TX           |
| 51 | Diet                                                                                                                                                                                      | MH (explode) |
| 52 | Diet                                                                                                                                                                                      | TX           |
| 53 | Nutrition                                                                                                                                                                                 | TX           |
| 54 | Nutrition therapy                                                                                                                                                                         | MH (explode) |
| 55 | Nutrition therapy                                                                                                                                                                         | TX           |
| 56 | Non adj2 pharmacological                                                                                                                                                                  | TX           |
| 57 | Pharmaceutical preparations                                                                                                                                                               | MH (explode) |
| 58 | Pharmaceutical preparations                                                                                                                                                               | TX           |
| 59 | Pharmaceutical Aids                                                                                                                                                                       | MH (explode) |
| 60 | Pharmaceutical Aids                                                                                                                                                                       | TX           |
| 61 | Pharmacological intervention                                                                                                                                                              | TX           |
| 62 | Pharmaceutical                                                                                                                                                                            | TX           |
| 63 | Drug                                                                                                                                                                                      | TX           |
| 64 | Vitamin adj2 d                                                                                                                                                                            | TX           |
| 65 | Growth adj2 hormone                                                                                                                                                                       | TX           |
| 66 | Dehydroepiandrosterone                                                                                                                                                                    | TX           |
| 67 | Growth adj2 factor                                                                                                                                                                        | TX           |
| 68 | Testosterone                                                                                                                                                                              | TX           |

|     |                                                                                                                                                                                                                                                                  |              |
|-----|------------------------------------------------------------------------------------------------------------------------------------------------------------------------------------------------------------------------------------------------------------------|--------------|
| 69  | Angiotensin-Converting Enzyme Inhibitors                                                                                                                                                                                                                         | MH (explode) |
| 70  | Angiotensin-Converting Enzyme Inhibitors                                                                                                                                                                                                                         | TX           |
| 71  | ACE inhibitor                                                                                                                                                                                                                                                    | TX           |
| 72  | 34 OR 35 OR 36 OR 37 OR 38 OR 39 OR 40 OR 41 OR 42 OR 43 OR 44 OR 45 OR 46 OR 47 OR 48 OR 49 OR 50 OR 51 OR 52 OR 53 OR 54 OR 55 OR 56 OR 57 OR 58 OR 59 OR 60 OR 61 OR 62 OR 63 OR 64 OR 65 OR 66 OR 67 OR 68 OR 69 OR 70 OR 71                                 |              |
| 73  | Sarcopenia                                                                                                                                                                                                                                                       | MH (explode) |
| 74  | Sarcopenia                                                                                                                                                                                                                                                       | TX           |
| 75  | Cachexia                                                                                                                                                                                                                                                         | MH (explode) |
| 76  | Cachexia                                                                                                                                                                                                                                                         | TX           |
| 77  | Muscle adj2 wasting                                                                                                                                                                                                                                              | TX           |
| 78  | Protein-energy malnutrition                                                                                                                                                                                                                                      | MH (explode) |
| 79  | Protein-energy malnutrition                                                                                                                                                                                                                                      | TX           |
| 80  | Wasting adj2 (protein energy OR protein-energy)                                                                                                                                                                                                                  | TX           |
| 81  | Frailty                                                                                                                                                                                                                                                          | MH (explode) |
| 82  | Frailty                                                                                                                                                                                                                                                          | TX           |
| 83  | Muscle weakness                                                                                                                                                                                                                                                  | MH (explode) |
| 84  | Muscle weakness                                                                                                                                                                                                                                                  | TX           |
| 85  | Muscle atrophy                                                                                                                                                                                                                                                   | MH (explode) |
| 86  | Muscle atrophy                                                                                                                                                                                                                                                   | TX           |
| 87  | Muscle strength                                                                                                                                                                                                                                                  | MH (explode) |
| 88  | Muscle strength                                                                                                                                                                                                                                                  | TX           |
| 89  | Body composition                                                                                                                                                                                                                                                 | TX           |
| 90  | Fat free mass                                                                                                                                                                                                                                                    | TX           |
| 91  | Muscle, skeletal                                                                                                                                                                                                                                                 | MH (explode) |
| 92  | Muscle, skeletal                                                                                                                                                                                                                                                 | TX           |
| 93  | Lean body mass                                                                                                                                                                                                                                                   | TX           |
| 94  | Muscle mass                                                                                                                                                                                                                                                      | TX           |
| 95  | Grip strength                                                                                                                                                                                                                                                    | TX           |
| 96  | Sit adj2 stand                                                                                                                                                                                                                                                   | TX           |
| 97  | MRI                                                                                                                                                                                                                                                              | TW           |
| 98  | Magnetic resonance imaging                                                                                                                                                                                                                                       | TW           |
| 99  | DEXA                                                                                                                                                                                                                                                             | TW           |
| 100 | Dual-energy x-ray absorptiometry                                                                                                                                                                                                                                 | TX           |
| 101 | Bioelectrical adj2 impedance                                                                                                                                                                                                                                     | TX           |
| 102 | CT adj2 imaging                                                                                                                                                                                                                                                  | TW           |
| 103 | Physical functional performance                                                                                                                                                                                                                                  | MH (explode) |
| 104 | Physical functional performance                                                                                                                                                                                                                                  | TX           |
| 105 | Short physical performance battery                                                                                                                                                                                                                               | TX           |
| 106 | SPPB                                                                                                                                                                                                                                                             | TX           |
| 107 | Timed up and go                                                                                                                                                                                                                                                  | TX           |
| 108 | Walk adj2 speed                                                                                                                                                                                                                                                  | TX           |
| 109 | Gait adj2 speed                                                                                                                                                                                                                                                  | TX           |
| 110 | Quality adj2 life                                                                                                                                                                                                                                                | TW           |
| 111 | Physical adj2 activity                                                                                                                                                                                                                                           | TW           |
| 112 | Fall*                                                                                                                                                                                                                                                            | TW           |
| 113 | Hospital adj2 admissions                                                                                                                                                                                                                                         | TW           |
| 114 | 73 OR 74 OR 75 OR 76 OR 77 OR 78 OR 79 OR 80 OR 81 OR 82 OR 83 OR 84 OR 85 OR 86 OR 87 OR 88 OR 89 OR 90 OR 91 OR 92 OR 93 OR 94 OR 95 OR 96 OR 97 OR 98 OR 99 OR 100 OR 101 OR 102 OR 103 OR 104 OR 105 OR 106 OR 107 OR 108 OR 109 OR 110 OR 111 OR 112 OR 113 |              |
| 115 | Randomized controlled trial as topic                                                                                                                                                                                                                             | MH (explode) |
| 116 | Controlled clinical trial                                                                                                                                                                                                                                        | MH (explode) |
| 117 | Randomized OR Randomised                                                                                                                                                                                                                                         | TX           |
| 118 | Placebo                                                                                                                                                                                                                                                          | TX           |
| 119 | Drug therapy                                                                                                                                                                                                                                                     | TX           |
| 120 | Random*                                                                                                                                                                                                                                                          | TX           |
| 121 | Trial                                                                                                                                                                                                                                                            | TX           |
| 122 | Groups                                                                                                                                                                                                                                                           | TX           |
| 123 | 115 OR 116 OR 117 OR 118 OR 119 OR 120 OR 121 OR 122                                                                                                                                                                                                             | TX           |
| 124 | Exp animals/ not humans                                                                                                                                                                                                                                          | TX           |
| 125 | 123 NOT 124                                                                                                                                                                                                                                                      | TX           |
| 126 | 33 AND 72 AND 114 AND 125                                                                                                                                                                                                                                        |              |

Table S2: Full search strategy for EMBASE database. All fields (AF), End-stage kidney disease (ESKD), end-stage renal disease (ESRD).

|    | Search term                                                                                                                                              | Field |
|----|----------------------------------------------------------------------------------------------------------------------------------------------------------|-------|
| 1  | Renal insufficiency                                                                                                                                      | AF    |
| 2  | Renal insufficiency, chronic                                                                                                                             | AF    |
| 3  | Renal Dialysis                                                                                                                                           | AF    |
| 4  | Kidney failure, chronic                                                                                                                                  | AF    |
| 5  | Renal Replacement therapy                                                                                                                                | AF    |
| 6  | Haemodialysis                                                                                                                                            | AF    |
| 7  | Hemodialysis                                                                                                                                             | AF    |
| 8  | Dialysis                                                                                                                                                 | AF    |
| 9  | ESRD                                                                                                                                                     | AF    |
| 10 | ESKD                                                                                                                                                     | AF    |
| 11 | kidney disease adj2 (end-stage OR end stage OR chronic)                                                                                                  | AF    |
| 12 | renal disease adj2 (end-stage OR end stage OR chronic)                                                                                                   | AF    |
| 13 | kidney failure adj2 (end-stage OR end stage OR chronic)                                                                                                  | AF    |
| 14 | Renal replacement therapy                                                                                                                                | AF    |
| 15 | renal failure adj2 (end-stage OR end stage OR chronic)                                                                                                   | AF    |
| 16 | Transplant*                                                                                                                                              | AF    |
| 17 | Kidney diseases                                                                                                                                          | AF    |
| 18 | Peritoneal dialysis                                                                                                                                      | AF    |
| 19 | Peritoneal dialysis, continuous ambulatory                                                                                                               | AF    |
| 20 | Kidney transplantation                                                                                                                                   | AF    |
| 21 | Conservative treatment                                                                                                                                   |       |
| 22 | 1 OR 2 OR 3 OR 4 OR 5 OR 6 OR 7 OR 8 OR 9 OR 10 OR 11 OR 12 OR 13 OR 14 OR 15 OR 16 OR 17 OR 18 OR 19 OR 20 OR 21                                        |       |
| 23 | Lifestyle                                                                                                                                                | AF    |
| 24 | Lifestyle intervention                                                                                                                                   | AF    |
| 25 | Exercise                                                                                                                                                 | AF    |
| 26 | Healthy Lifestyle                                                                                                                                        | AF    |
| 27 | Exercise therapy                                                                                                                                         | AF    |
| 28 | Exercise training                                                                                                                                        | AF    |
| 29 | Exercise program*                                                                                                                                        | AF    |
| 30 | Aerobic exercise                                                                                                                                         | AF    |
| 31 | Aerobic training                                                                                                                                         | AF    |
| 32 | Resistance training                                                                                                                                      | AF    |
| 33 | Physical Activity                                                                                                                                        | AF    |
| 34 | Diet                                                                                                                                                     | AF    |
| 35 | Nutrition                                                                                                                                                | AF    |
| 36 | Nutrition therapy                                                                                                                                        | AF    |
| 37 | Non adj2 pharmacological                                                                                                                                 | AF    |
| 38 | Pharmaceutical preparations                                                                                                                              | AF    |
| 39 | Pharmaceutical Aids                                                                                                                                      | AF    |
| 40 | Pharmacological intervention                                                                                                                             | AF    |
| 41 | Pharmaceutical                                                                                                                                           | AF    |
| 42 | Drug                                                                                                                                                     | AF    |
| 43 | Vitamin adj2 d                                                                                                                                           | AF    |
| 44 | Growth adj2 hormone                                                                                                                                      | AF    |
| 45 | Dehydroepiandrosterone                                                                                                                                   | AF    |
| 46 | Growth adj2 factor                                                                                                                                       | AF    |
| 47 | Testosterone                                                                                                                                             | AF    |
| 48 | Angiotensin-Converting Enzyme Inhibitors                                                                                                                 | AF    |
| 49 | ACE inhibitor                                                                                                                                            | AF    |
| 50 | 23 OR 24 OR 25 OR 26 OR 27 OR 28 OR 29 OR 30 OR 31 OR 32 OR 33 OR 34 OR 35 OR 36 OR 37 OR 38 OR 39 OR 40 OR 41 OR 42 OR 43 OR 44 OR 45 OR 46 OR 47 OR 48 |       |
| 51 | Sarcopenia                                                                                                                                               | AF    |
| 52 | Cachexia                                                                                                                                                 | AF    |
| 53 | Muscle adj2 wasting                                                                                                                                      | AF    |
| 54 | Protein-energy malnutrition                                                                                                                              | AF    |
| 55 | Wasting adj2 (protein energy or protein-energy)                                                                                                          | AF    |
| 56 | Frailty                                                                                                                                                  | AF    |
| 57 | Muscle weakness                                                                                                                                          | AF    |
| 58 | Muscle atrophy                                                                                                                                           | AF    |
| 59 | Muscle strength                                                                                                                                          | AF    |
| 60 | Body composition                                                                                                                                         | AF    |
| 61 | Fat free mass                                                                                                                                            | AF    |
| 62 | Skeletal muscle                                                                                                                                          | AF    |
| 63 | Lean body mass                                                                                                                                           | AF    |
| 64 | Muscle mass                                                                                                                                              | AF    |
| 65 | Grip strength                                                                                                                                            | AF    |

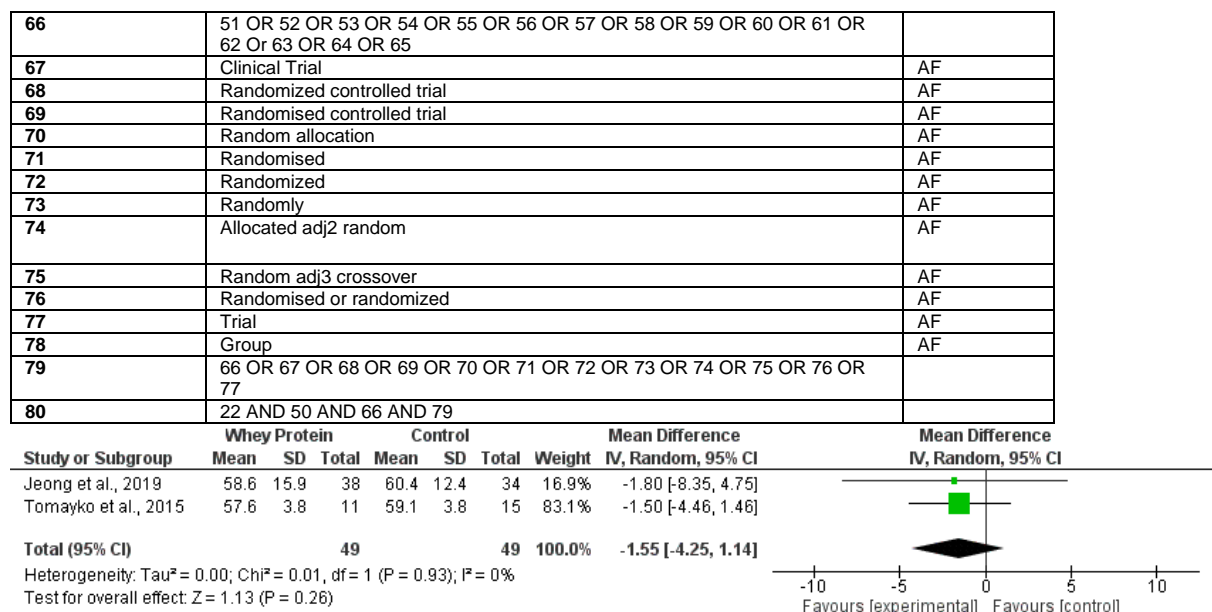

Figure S1. Effect of whey protein supplementation on whole lean body mass (kg) measured by DEXA in individuals receiving haemodialysis. Data are expressed as mean difference and 95% CI. Data for whey protein and control groups from both trials [22,66].

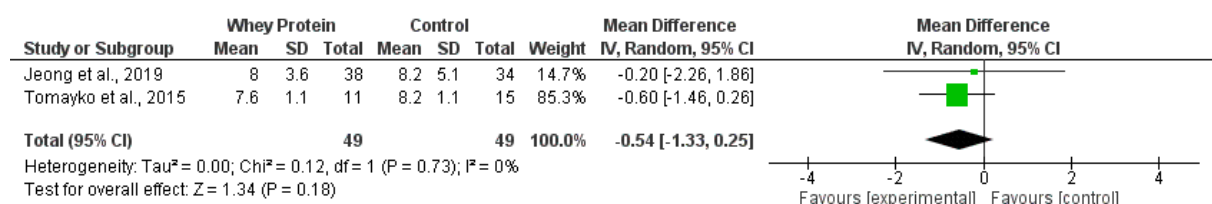

Figure S2. Effect of whey protein supplementation on timed-up-and-go in individuals receiving haemodialysis. Data are expressed as mean difference and 95% CI. Data for whey protein and control groups from both trials[22,66].
